# Supplementary material for: Synthesis of highly uniform Cu2O spheres by a two-step approach and their assembly to form photonic crystals with a brilliant color
Source: Royal Society of Chemistry journal article supplement (doi:10.1039/c5nr08401f), 2016-01-01
Supplement: c5nr08401f1.pdf [file c5nr08401f1.pdf]

## Supporting Information

### Synthesis of Highly Uniform Cu<sub>2</sub>O Spheres by a Two-step Approach and their Assembly to Form Photonic Crystals with Brilliant Color

Xin Su, Jie Chang, Suli Wu\*, Bingtao Tang and Shufen Zhang

*State Key Laboratory of Fine Chemicals, Dalian University of Technology, Dalian, P.R.China*

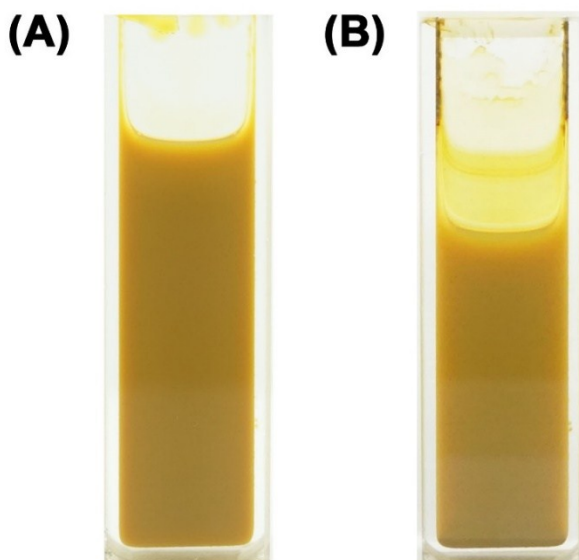

**Figure S1.** Digital images of Cu<sub>2</sub>O dispersion in ethanol. (a) just after preparation; (b) stored in ambient environment for 5 days

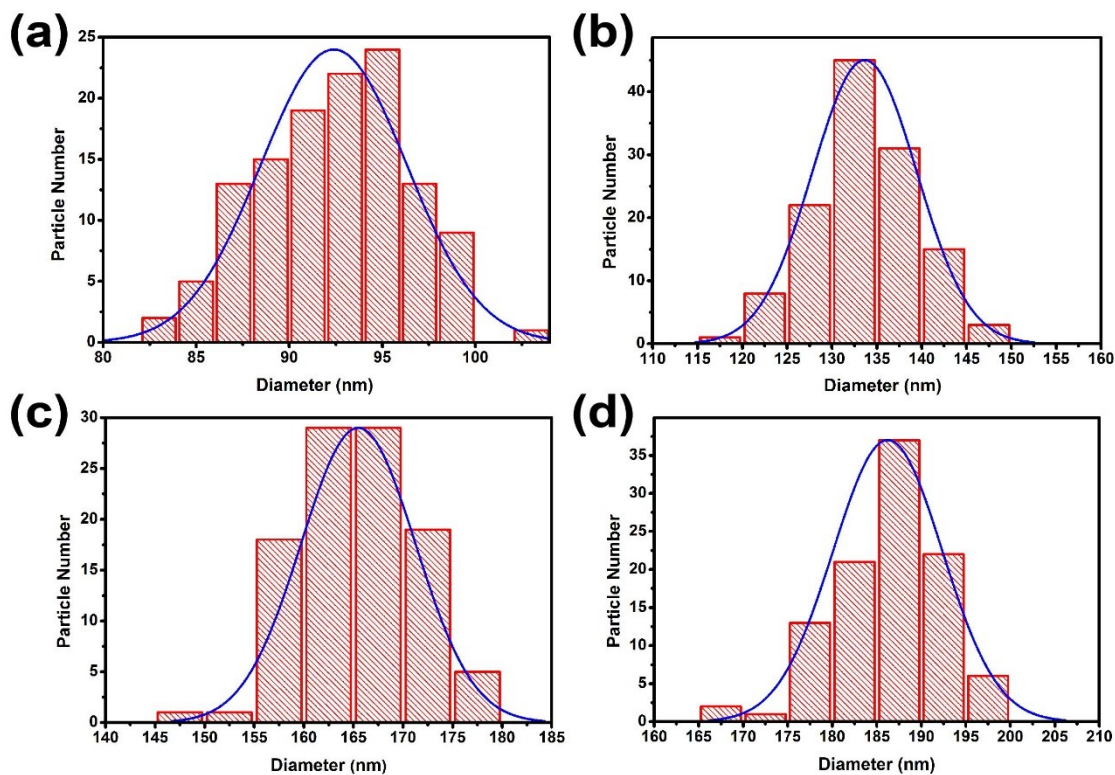

**Figure S2.** Size distribution of monodisperse  $\text{Cu}_2\text{O}$  spheres in different diameters. (a) 93 nm; (b) 133 nm; (c) 165 nm; (d) 187 nm

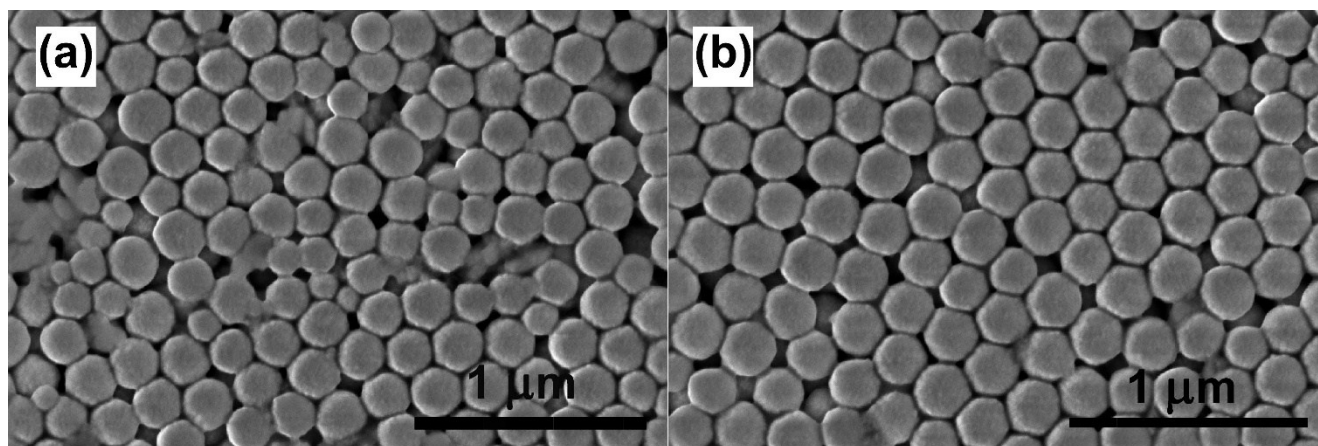

**Figure S3.** SEM images of  $\text{Cu}_2\text{O}$  spheres with different amount of Cu precursor. (a) 1.2 mL; (b) 1.4 mL

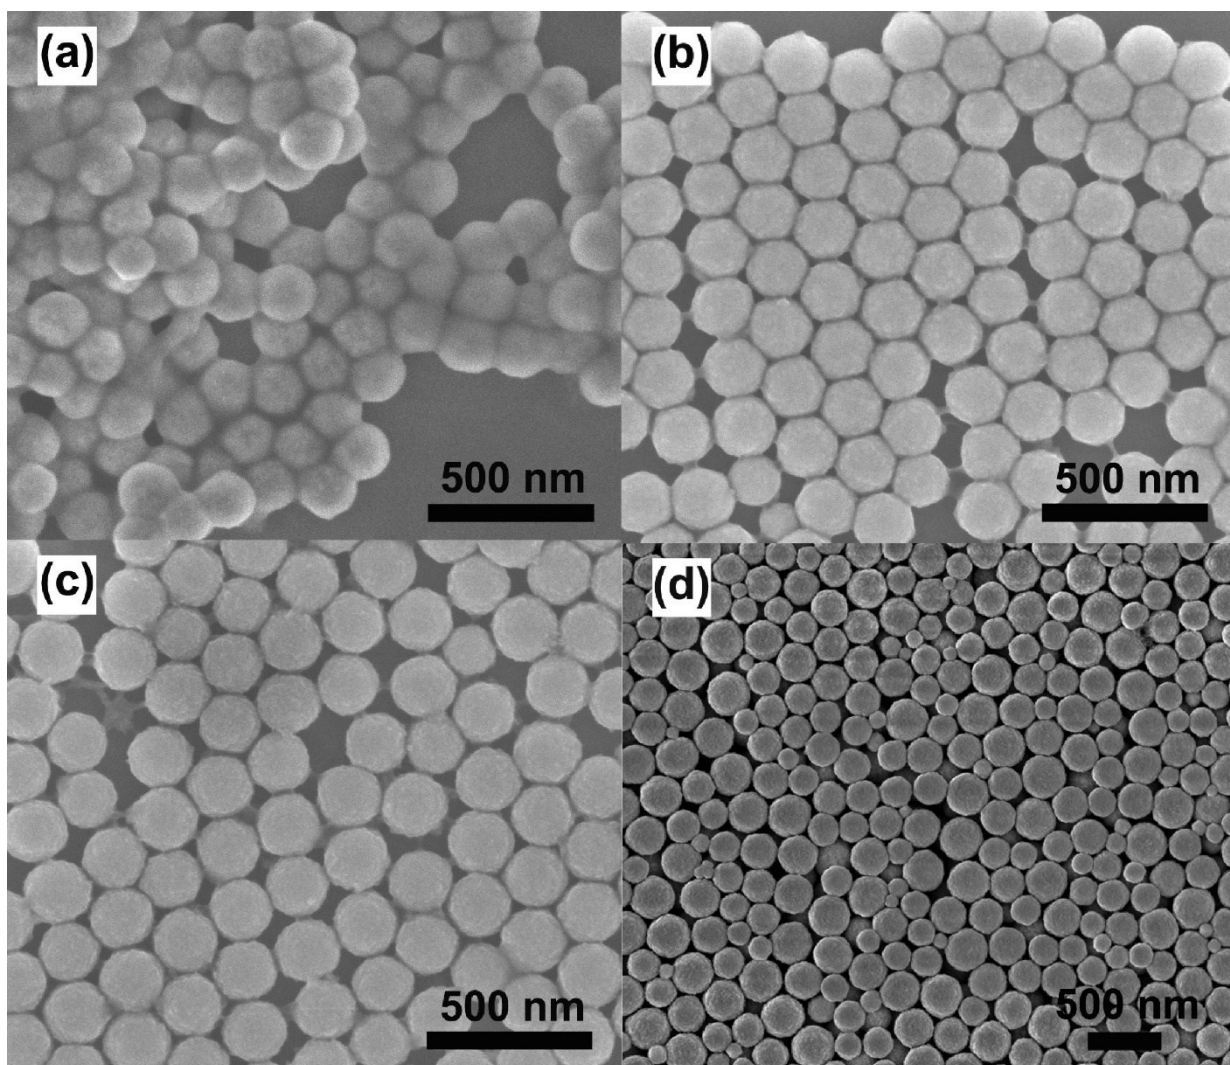

**Figure S4.** SEM images of products at different times since the formation of secondary structures.(a) 4 min; (b) 30 min; (c) 90 min; (d) products of reaction at 160 °C

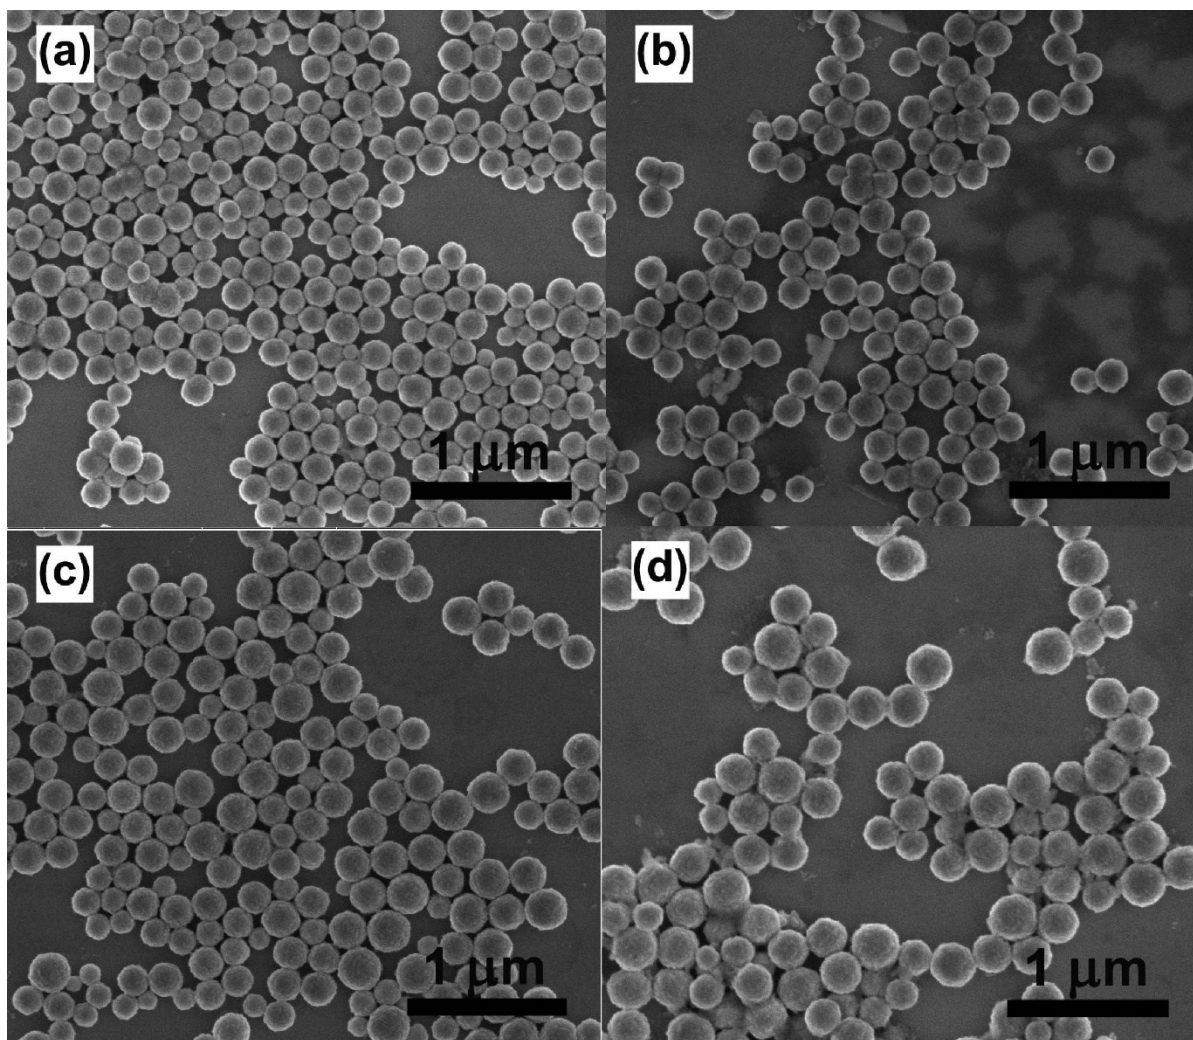

**Figure S5** Products with different heating time from 120 °C to 150 °C in the absence of seeds. (a)10 min; (b)12 min; (c)16 min; (d)18 min
